# Supplementary material
Source: publisher figshare collection journal article supplement (https://acs.figshare.com/ndownloader/files/30773882)
Supplement: Supplementary file 1 [file 30773882]

## Sheet: 1-fs&2-fs
1-fs			exp	unified						split
				run1	run2	run3	run4	avg		run1	run2	run3	run4	avg
1	CAT-13a	CAT-17i	-0.63	-1.38	0.04	-0.21	-0.75	-0.575		0.49	-0.81	0.73	-0.36	0.0125
2	CAT-13c	CAT-17i	-0.15	-0.99	-0.39	-1.34	-0.7	-0.855		-0.13	-0.06	-0.4	0.39	-0.05
3	CAT-13a	CAT-13m	0.08	-1.47	-0.85	-0.73	-0.76	-0.9525		-0.71	-1.82	-1.81	-0.88	-1.305
4	CAT-13e	CAT-17i	0.49	-1.62	-2.01	-2.05	-1.45	-1.7825		-2.78	-2.39	-2.63	-2.35	-2.5375
5	CAT-13g	CAT-17g	-0.65	-0.86	0.94	1.36	1.64	0.77		1.38	1.01	1.28	1.32	1.2475
6	CAT-13k	CAT-4d	0.59	-0.26	-0.16	-1.03	-0.9	-0.5875		-1.4	-1.38	-1.15	0.69	-0.81
7	CAT-13n	CAT-13k	-1.16	-1.22	-2.26	-2.06	-0.66	-1.55		-2.67	-1.47	-0.79	-2.43	-1.84
8	CAT-13n	CAT-13a	-0.3	-0.51	-1.23	-0.96	-0.13	-0.7075		-0.8	-0.2	-0.53	-0.52	-0.5125
9	CAT-13n	CAT-4i	0.28	-1.95	-2.09	-1.94	-2.17	-2.0375		-2.49	-2.02	-1.24	-1.8	-1.8875
10	CAT-13o	CAT-17i	-0.93	-2.67	-0.97	-1.31	-0.76	-1.4275		-0.05	-0.35	-1.25	-0.06	-0.4275
11	CAT-17g	CAT-13c	0.42	0.91	0.21	-0.73	-0.71	-0.08		-1.21	-0.65	-0.66	-0.69	-0.8025
12	CAT-4l	CAT-13k	-0.36	-2.6	-2.97	-3.42	-2.72	-2.9275		-3.61	-2.41	-2.13	-2.99	-2.785
13	CAT-4m	CAT-4c	1.3	1.5	1.96	2.9	1.98	2.085		2.62	2.55	2.48	2.82	2.6175
14	CAT-4m	CAT-4l	-0.19	4.79	4.86	4.41	4.84	4.725		3.24	4.01	4.77	4.67	4.1725
15	CAT-4n	CAT-13k	-0.61	-0.09	-1.15	-0.72	-0.37	-0.5825		-1.69	-0.02	-1.63	-0.01	-0.8375
2-fs
1	CAT-13a	CAT-17i	-0.63	-0.34	-0.79	-0.54	-0.19	-0.465		0.16	0.72	0.57	0.36	0.4525
2	CAT-13c	CAT-17i	-0.15	-0.28	-0.67	-0.43	-0.17	-0.3875		1.53	0.79	0.37	0.55	0.81
3	CAT-13a	CAT-13m	0.08	-0.39	-2.95	-0.44	-1.68	-1.365		-1.7	-1.7	-1.6	-1.71	-1.6775
4	CAT-13e	CAT-17i	0.49	-2.34	-1.76	-2.6	-2.71	-2.3525		-2.79	-2.36	-2.62	-1.83	-2.4
5	CAT-13g	CAT-17g	-0.65	2.2	1.99	2.28	1.25	1.93		0.81	2.55	1.35	1.96	1.6675
6	CAT-13k	CAT-4d	0.59	-1.16	-1.31	-1.04	-0.96	-1.1175		-1.4	-0.64	-0.32	-1.52	-0.97
7	CAT-13n	CAT-13k	-1.16	-1.32	-1.82	-1.92	-2.08	-1.785		-0.53	-1.82	-2.08	-2.73	-1.79
8	CAT-13n	CAT-13a	-0.3	-0.12	-1.13	-1.22	-1.29	-0.94		-2.02	-1.09	-0.94	-0.37	-1.105
9	CAT-13n	CAT-4i	0.28	-1.22	-2.58	-2.47	-1.81	-2.02		-2.85	-2.87	-2.6	-1.64	-2.49
10	CAT-13o	CAT-17i	-0.93	-1.75	-0.43	-1.02	-1.23	-1.1075		0.06	0.81	-1.44	-0.28	-0.2125
11	CAT-17g	CAT-13c	0.42	-1.24	-0.6	-1	-0.7	-0.885		-1.86	-1.01	0.01	-0.29	-0.7875
12	CAT-4l	CAT-13k	-0.36	-3.16	-3.08	-2.98	-2.54	-2.94		-3.48	-4.22	-2.49	-2.53	-3.18
13	CAT-4m	CAT-4c	1.3	2.64	2.47	2.25	3.09	2.6125		3.61	2.68	3.18	3.17	3.16
14	CAT-4m	CAT-4l	-0.19	4.66	4.72	4.71	4.88	4.7425		5.4	4.42	4.69	4.16	4.6675
15	CAT-4n	CAT-13k	-0.61	-1.16	-0.97	-0.85	-1.26	-1.06		0.21	-1.11	-1.16	-2.53	-1.1475

## Sheet: 4-fs
				unified										split
				run1	run2	run3	run4	run5	run6	run7	run8	avg		run1	run2	run3	run4	run5	run6	run7	run8	avg
			exp
1	CAT-13a	CAT-17i	-0.63	0.05	-0.56	-0.23	-0.31	0.65	-0.12	-0.34	-0.56	-0.18		-0.18	0.76	0.4	0.38	0.34	0.18	0.15	0.24	0.28
2	CAT-13c	CAT-17i	-0.15	-0.35	-0.36	-0.82	-0.94	0.11	-1.13	0.11	-0.43	-0.48		0.09	0.04	-0.75	0.31	-0.33	-0.01	0.18	-0.48	-0.12
3	CAT-13a	CAT-13m	0.08	-0.98	-1.67	-1.62	-0.62	-1.58	-1.76	0.37	-0.05	-0.99		-1.73	-1.81	-0.93	-1.15	-1.59	-1.29	-1.62	-0.91	-1.38
4	CAT-13e	CAT-17i	0.49	-1.59	-1.61	-1.47	-1.8	-1.84	-1.95	-1.67	-1.95	-1.74		-1.58	-1.76	-3.16	-2.73	-1.62	-2.34	-1.46	-2.21	-2.11
5	CAT-13g	CAT-17g	-0.65	1.38	1.54	1.59	1.5	1.34	1.58	1.6	1.51	1.51		1.11	1.14	1.37	1.9	1.34	1.79	2.46	1.64	1.59
6	CAT-13k	CAT-4d	0.59	0.38	-1.02	-1.23	-0.75	-0.78	0.16	-0.6	-0.49	-0.54		-1.61	-1.55	-1	-0.54	-0.28	-0.43	-0.3	-0.86	-0.82
7	CAT-13n	CAT-13k	-1.16	-2.41	-2.46	-0.89	-1.71	-0.96	-1.74	-2.36	-1.33	-1.73		-1.82	-2.17	-2.5	-1.65	-2.11	-1.95	-1.93	-2.01	-2.02
8	CAT-13n	CAT-13a	-0.3	-1.06	-0.51	-0.01	-1.25	-0.5	-0.05	-0.79	-1.46	-0.7		-1.06	-1.5	-1.42	-0.78	-1.39	-0.85	-0.95	-1.2	-1.14
9	CAT-13n	CAT-4i	0.28	-2.08	-1.22	-1.73	-1.36	-1.72	-1.12	-1.83	-1.26	-1.54		-1.95	-1.64	-2.89	-2.82	-1.52	-1.5	-1.63	-1.47	-1.93
10	CAT-13o	CAT-17i	-0.93	-1.28	-0.82	-0.41	-1.76	-1.49	-0.84	-0.97	-0.94	-1.06		-0.52	-0.03	-0.28	0.37	0.04	-0.08	-0.07	-0.39	-0.12
11	CAT-17g	CAT-13c	0.42	-0.23	-1.07	-0.37	-0.35	-0.77	-0.28	-0.59	-0.49	-0.52		-0.96	-0.48	-0.3	-1.59	-0.61	-0.59	-0.91	-1.49	-0.87
12	CAT-4l	CAT-13k	-0.36	-2.82	-1.7	-3.44	-3.72	-2.44	-2.76	-2.97	-2.84	-2.84		-3.99	-2.37	-3.18	-3.73	-1.78	-1.96	-3.72	-3.06	-2.97
13	CAT-4m	CAT-4c	1.3	2.07	2.63	2.07	2.22	2.19	2.28	1.83	1.97	2.16		2.62	3.47	1.99	1.53	2.97	3.2	2.96	1.68	2.55
14	CAT-4m	CAT-4l	-0.19	4.13	4.59	4.7	4.13	4.41	4.47	4.31	4.17	4.36		4.42	4.64	4.35	4.91	4.31	3.72	3.98	4.03	4.3
15	CAT-4n	CAT-13k	-0.61	-0.3	-0.79	-0.72	-0.77	-0.6	-0.96	-0.34	-0.54	-0.63		-0.52	-0.55	-1.39	-0.16	-0.43	-1.63	-0.93	-1.17	-0.85

## Sheet: relative
Ligand 0	Ligand 1	exp_ddG
			r1	r2	r3	r4	avg	ccc
CAT-13a	CAT-17g	-0.9	-0.31	0.09	-0.3	-0.69	-0.3025	0.51
CAT-13a	CAT-17i	-0.63					-0.18	-0.99
CAT-13a	CAT-13m	0.08					-0.99	-1.27
CAT-13b	CAT-17g	-0.62	-0.3	-0.2	-0.21	-0.81	-0.38	-0.41
CAT-13c	CAT-17i	-0.15					-0.48	-0.73
CAT-13d	CAT-13h	0.84	0.22	0.21	0.07	0.19	0.1725	0.41
CAT-13d	CAT-17h	0.14	0.93	0.85	0.8	0.68	0.815	0.33
CAT-13d	CAT-17d	1.05	1.05	1.32	1.2	0.9	1.1175	1.64
CAT-13d	CAT-13b	1.35	1.55	1.4	1.15	1.25	1.3375	1.31
CAT-13d	CAT-13f	1.38	0.25	-0.21	0.07	0.07	0.045	0.5
CAT-13d	CAT-17a	-0.26	-2.75	-2.89	-2.83	-2.86	-2.8325	-2.2
CAT-13d	CAT-13i	1.2	0.6	0.69	0.64	0.41	0.585	0.07
CAT-13e	CAT-17g	0.22	0.4	0.85	0.91	0.32	0.62	0.19
CAT-13e	CAT-17i	0.49					-1.74	-1.31
CAT-13g	CAT-17g	-0.65					1.51	1.28
CAT-13g	CAT-17i	-0.38	-0.39	-0.64	0.01	-0.77	-0.4475	-0.22
CAT-13h	CAT-17i	0.16	-0.84	-1.26	-1.45	-1.44	-1.2475	-1.01
CAT-13j	CAT-4o	-0.65	-0.63	-0.63	-0.39	-0.93	-0.645	-0.35
CAT-13k	CAT-4d	0.59					-0.54	-0.85
CAT-13k	CAT-4b	0.07	-1.58	-0.85	-0.75	-0.37	-0.8875	-0.81
CAT-13n	CAT-13k	-1.16					-1.73	-2.06
CAT-13n	CAT-13a	-0.3					-0.7	-0.98
CAT-13n	CAT-4i	0.28					-1.54	-0.93
CAT-13o	CAT-17i	-0.93					-1.06	-1.55
CAT-13o	CAT-17h	-1.79	-1.26	-1.39	-0.9	-0.83	-1.095	-0.61
CAT-17b	CAT-13d	-0.45	-0.9	-0.83	-0.97	-0.68	-0.845	-0.05
CAT-17b	CAT-17e	0	1.05	0.9	0.95	0.95	0.9625	0.16
CAT-17c	CAT-17e	-0.16	1.5	1.51	1.45	1.31	1.4425	1.16
CAT-17f	CAT-17e	-0.6	-0.23	-0.27	-0.1	-0.21	-0.2025	0.45
CAT-17g	CAT-17c	-0.12	-1.56	-1.69	-1.73	-1.32	-1.575	-1.86
CAT-17g	CAT-17f	0.32	-1.81	-1.84	-1.75	-1.8	-1.8	-1.15
CAT-17g	CAT-13i	0.47	-1.13	-1.3	-1.78	-1.24	-1.3625	-0.84
CAT-17g	CAT-13c	0.42					-0.52	-0.77
CAT-17g	CAT-17d	0.32	1.25	1.16	1.25	1.36	1.255	0.74
CAT-17i	CAT-13f	0.38	1.11	1.72	1.82	1.54	1.5475	1.1
CAT-17i	CAT-17a	-1.26	-0.88	-1.04	-0.88	-1.12	-0.98	-1.61
CAT-24	CAT-17e	1.33	1.64	2.14	1.89	1.84	1.8775	2.3
CAT-24	CAT-17i	1.88	1.86	2.06	1.85	1.88	1.9125	1.49
CAT-4a	CAT-4o	-1.45	-0.35	-0.88	-0.42	-0.26	-0.4775	-0.27
CAT-4a	CAT-13k	-1.77	-0.66	-0.76	-0.99	-0.98	-0.8475	-1.06
CAT-4c	CAT-4o	-1.53	-0.87	-1.2	-0.75	-0.77	-0.8975	-0.9
CAT-4i	CAT-13m	-0.5	-2.07	-1.69	-1.58	-2.43	-1.9425	-1.33
CAT-4j	CAT-4o	-0.36	-1.38	-1.18	-1.3	-1.18	-1.26	-1.34
CAT-4k	CAT-4o	-1.53	-0.98	-1.51	-2.06	-1.44	-1.4975	-1.72
CAT-4l	CAT-13k	-0.36					-2.84	-3.36
CAT-4m	CAT-4c	1.3					2.16	2.16
CAT-4m	CAT-13j	0.42	1.27	1.1	1.38	1.51	1.315	1.62
CAT-4m	CAT-4j	0.13	2.61	2.63	2.83	2.65	2.68	2.6
CAT-4m	CAT-4n	0.06	0.44	0.26	0.37	0.46	0.3825	0.74
CAT-4m	CAT-13k	-0.55	-0.1	-0.78	-0.24	-0.05	-0.2925	0.47
CAT-4m	CAT-13m	0.39	0.7	0.39	1.04	0.3	0.6075	0.28
CAT-4m	CAT-4l	-0.19					4.36	3.84
CAT-4m	CAT-4k	1.3	3.42	2.9	3.12	3.34	3.195	2.98
CAT-4m	CAT-4p	-0.93	-0.52	-0.47	-0.53	-0.46	-0.495	-0.78
CAT-4n	CAT-13k	-0.61					-0.63	-0.27
CAT-4o	CAT-4b	-0.25	-1.17	-1.53	-1.67	-1.73	-1.525	-1.61
CAT-4o	CAT-4d	0.27	-1.82	-1.9	-1.86	-2.21	-1.9475	-1.64
CAT-4p	CAT-13k	0.38	1.72	1.47	1.6	1.32	1.5275	1.25

## Sheet: statistics
Ligand 0	Ligand 1				exp_ddG	AMBER20				FEP+				AMBER18
						avg	abs_error				abs_error				abs_error
CAT-13a	CAT-17g	11	26	1	-0.9	-0.3025	0.5975	0.357006		-0.02	0.88	0.7744		1.95	2.85	8.1225
CAT-13a	CAT-17i	11	20	2	-0.63	-0.18	0.45	0.2025		-0.76	0.13	0.0169		1.3	1.93	3.7249
CAT-13a	CAT-13m	11	7	3	0.08	-0.99	1.07	1.1449		-0.95	1.03	1.0609		-0.8	0.88	0.7744
CAT-13b	CAT-17g	5	26	4	-0.62	-0.38	0.24	0.0576		0.36	0.98	0.9604		-1.35	0.73	0.5329
CAT-13c	CAT-17i	17	20	5	-0.15	-0.48	0.33	0.1089		0.26	0.41	0.1681		-1.2	1.05	1.1025
CAT-13d	CAT-13h	3	34	6	0.84	0.1725	0.6675	0.445556		1.46	0.62	0.3844		3.8	2.96	8.7616
CAT-13d	CAT-17h	3	24	7	0.14	0.815	0.675	0.455625		0.05	0.09	0.0081		0.6	0.46	0.2116
CAT-13d	CAT-17d	3	16	8	1.05	1.1175	0.0675	0.00455625		2.71	1.66	2.7556		4.2	3.15	9.9225
CAT-13d	CAT-13b	3	5	9	1.35	1.3375	0.0125	0.00015625		2.12	0.77	0.5929		0.55	0.8	0.64
CAT-13d	CAT-13f	3	2	10	1.38	0.045	1.335	1.78222		0.13	1.25	1.5625		0.9	0.48	0.2304
CAT-13d	CAT-17a	3	13	11	-0.26	-2.8325	2.5725	6.61776		-0.78	0.52	0.2704		-0.5	0.24	0.0576
CAT-13d	CAT-13i	3	15	12	1.2	0.585	0.615	0.378225		-0.59	1.79	3.2041		1.15	0.05	0.0025
CAT-13e	CAT-17g	29	26	13	0.22	0.62	0.4	0.16		1.5	1.28	1.6384		-1.2	1.42	2.0164
CAT-13e	CAT-17i	29	20	14	0.49	-1.74	2.23	4.9729		1.04	0.55	0.3025		-0.4	0.89	0.7921
CAT-13g	CAT-17g	21	26	15	-0.65	1.51	2.16	4.6656		0.86	1.51	2.2801		1.65	2.3	5.29
CAT-13g	CAT-17i	21	20	16	-0.38	-0.4475	0.0675	0.00455625		0.84	1.22	1.4884		-3.4	3.02	9.1204
CAT-13h	CAT-17i	34	20	17	0.16	-1.2475	1.4075	1.98106		0.14	0.02	0.0004		-1.4	1.56	2.4336
CAT-13j	CAT-4o	33	31	18	-0.65	-0.645	0.005	2.5e-05		0.29	0.94	0.8836		-0.45	0.2	0.04
CAT-13k	CAT-4d	12	27	19	0.59	-0.54	1.13	1.2769		-0.59	1.18	1.3924		0.35	0.24	0.0576
CAT-13k	CAT-4b	12	25	20	0.07	-0.8875	0.9575	0.916806		-1.16	1.23	1.5129		0	0.07	0.0049
CAT-13n	CAT-13k	9	12	21	-1.16	-1.73	0.57	0.3249		-2.98	1.82	3.3124		-1.45	0.29	0.0841
CAT-13n	CAT-13a	9	11	22	-0.3	-0.7	0.4	0.16		-1.73	1.43	2.0449		-0.4	0.1	0.01
CAT-13n	CAT-4i	9	35	23	0.28	-1.54	1.82	3.3124		-0.23	0.51	0.2601		-4.3	4.58	20.9764
CAT-13o	CAT-17i	10	20	24	-0.93	-1.06	0.13	0.0169		-1.08	0.15	0.0225		-0.85	0.08	0.0064
CAT-13o	CAT-17h	10	24	25	-1.79	-1.095	0.695	0.483025		-1.98	0.19	0.0361		-3.55	1.76	3.0976
CAT-17b	CAT-13d	22	3	26	-0.45	-0.845	0.395	0.156025		0.46	0.91	0.8281		0.1	0.55	0.3025
CAT-17b	CAT-17e	22	36	27	0	0.9625	0.9625	0.926406		0.38	0.38	0.1444		0	0	0
CAT-17c	CAT-17e	18	36	28	-0.16	1.44	1.6	2.56		0.38	0.54	0.2916		-1.35	1.19	1.4161
CAT-17f	CAT-17e	14	36	29	-0.6	-0.2025	0.3975	0.158006		-0.03	0.57	0.3249		-2.1	1.5	2.25
CAT-17g	CAT-17c	26	18	30	-0.12	-1.575	1.455	2.11703		-1.86	1.74	3.0276		-1.5	1.38	1.9044
CAT-17g	CAT-17f	26	14	31	0.32	-1.8	2.12	4.4944		-1.36	1.68	2.8224		-0.85	1.17	1.3689
CAT-17g	CAT-13i	26	15	32	0.47	-1.3625	1.8325	3.35806		-0.67	1.14	1.2996		-1.2	1.67	2.7889
CAT-17g	CAT-13c	26	17	33	0.42	-0.52	0.94	0.8836		0.05	0.37	0.1369		1.2	0.78	0.6084
CAT-17g	CAT-17d	26	16	34	0.32	1.255	0.935	0.874225		1.03	0.71	0.5041		0.3	0.02	0.0004
CAT-17i	CAT-13f	20	2	35	0.38	1.5475	1.1675	1.36306		-0.77	1.15	1.3225		2.7	2.32	5.3824
CAT-17i	CAT-17a	20	13	36	-1.26	-0.98	0.28	0.0784		-1.96	0.7	0.49		-1.4	0.14	0.0196
CAT-24	CAT-17e	19	36	37	1.33	1.8775	0.5475	0.299756		1.98	0.65	0.4225		2.65	1.32	1.7424
CAT-24	CAT-17i	19	20	38	1.88	1.9125	0.0325	0.00105625		2.89	1.01	1.0201		3.1	1.22	1.4884
CAT-4a	CAT-4o	32	31	39	-1.45	-0.4775	0.9725	0.945756		-0.78	0.67	0.4489		0.1	1.55	2.4025
CAT-4a	CAT-13k	32	12	40	-1.77	-0.8475	0.9225	0.851006		-1.37	0.4	0.16		-1.35	0.42	0.1764
CAT-4c	CAT-4o	4	31	41	-1.53	-0.8975	0.6325	0.400056		-1.35	0.18	0.0324		1.15	2.68	7.1824
CAT-4i	CAT-13m	35	7	42	-0.5	-1.9425	1.4425	2.08081		-3.07	2.57	6.6049		-6.3	5.8	33.64
CAT-4j	CAT-4o	1	31	43	-0.36	-1.26	0.9	0.81		-0.58	0.22	0.0484		-0.55	0.19	0.0361
CAT-4k	CAT-4o	8	31	44	-1.53	-1.4975	0.0325	0.00105625		-1.21	0.32	0.1024		-1.4	0.13	0.0169
CAT-4l	CAT-13k	6	12	45	-0.36	-2.84	2.48	6.1504		-2.27	1.91	3.6481		-0.8	0.44	0.1936
CAT-4m	CAT-4c	28	4	46	1.3	2.16	0.86	0.7396		0.78	0.52	0.2704		0.9	0.4	0.16
CAT-4m	CAT-13j	28	33	47	0.42	1.315	0.895	0.801025		-0.01	0.43	0.1849		2.7	2.28	5.1984
CAT-4m	CAT-4j	28	1	48	0.13	2.68	2.55	6.5025		0.71	0.58	0.3364		2.25	2.12	4.4944
CAT-4m	CAT-4n	28	30	49	0.06	0.3825	0.3225	0.104006		-0.59	0.65	0.4225		0.85	0.79	0.6241
CAT-4m	CAT-13k	28	12	50	-0.55	-0.2925	0.2575	0.0663062		-1	0.45	0.2025		-3.15	2.6	6.76
CAT-4m	CAT-13m	28	7	51	0.39	0.6075	0.2175	0.0473062		-1.96	2.35	5.5225		-2.2	2.59	6.7081
CAT-4m	CAT-4l	28	6	52	-0.19	4.36	4.55	20.7025		1.05	1.24	1.5376		2.3	2.49	6.2001
CAT-4m	CAT-4k	28	8	53	1.3	3.195	1.895	3.59103		1.14	0.16	0.0256		2.2	0.9	0.81
CAT-4m	CAT-4p	28	23	54	-0.93	-0.495	0.435	0.189225		-1.1	0.17	0.0289		-0.55	0.38	0.1444
CAT-4n	CAT-13k	30	12	55	-0.61	-0.63	0.02	0.0004		0.08	0.69	0.4761		-0.6	0.01	0.0001
CAT-4o	CAT-4b	31	25	56	-0.25	-1.525	1.275	1.62562		-1.21	0.96	0.9216		-2.85	2.6	6.76
CAT-4o	CAT-4d	31	27	57	0.27	-1.9475	2.2175	4.91731		-1.66	1.93	3.7249		-1.5	1.77	3.1329
CAT-4p	CAT-13k	23	12	58	0.38	1.5275	1.1475	1.31676		0.59	0.21	0.0441		-1.45	1.83	3.3489
							0.987845	1.3061			0.867586	1.053			1.3331	1.78729
							MUE	RMSE			MUE	RMSE			MUE	RMSE

## Sheet: ABS
BACE1	Ligand 0	Ligand 1	exp_ddG	AMBER20	CCC				Ligand					Exp_dG	AMBER20_dG	CCC_dG
							-8.83	0	CAT-13a	0	0	0		-8.83	-8.70014	-9.00889
								1	CAT-13b	-0.28	0.0775	0.92		-9.11	-8.62264	-8.08889
1	CAT-13a	CAT-17g	-0.9	-0.3025	0.51			2	CAT-13c	-0.48	0.3	-0.26		-9.31	-8.40014	-9.26889
2	CAT-13a	CAT-17i	-0.63	-0.18	-0.99			3	CAT-13d	-1.63	-1.26	-0.39		-10.46	-9.96014	-9.39889
3	CAT-13a	CAT-13m	0.08	-0.99	-1.27			4	CAT-13e	-1.12	-0.9225	0.32		-9.95	-9.62264	-8.68889
4	CAT-13b	CAT-17g	-0.62	-0.38	-0.41			5	CAT-13f	-0.25	1.3675	0.11		-9.08	-7.33264	-8.89889
5	CAT-13c	CAT-17i	-0.15	-0.48	-0.73			6	CAT-13g	-0.25	-1.8125	-0.77		-9.08	-10.5126	-9.77889
6	CAT-13d	CAT-13h	0.84	0.1725	0.41			7	CAT-13h	-0.79	-1.0875	0.02		-9.62	-9.78764	-8.98889
7	CAT-13d	CAT-17h	0.14	0.815	0.33			8	CAT-13i	-0.43	-0.675	-0.32		-9.26	-9.37514	-9.32889
8	CAT-13d	CAT-17d	1.05	1.1175	1.64			9	CAT-13j	0.11	-0.015	0.06		-8.72	-8.71514	-8.94889
9	CAT-13d	CAT-13b	1.35	1.3375	1.31			10	CAT-13k	-0.86	-1.03	-1.08		-9.69	-9.73014	-10.0889
10	CAT-13d	CAT-13f	1.38	0.045	0.5			11	CAT-13m	0.08	-0.99	-1.27		-8.75	-9.69014	-10.2789
11	CAT-13d	CAT-17a	-0.26	-2.8325	-2.2			12	CAT-13n	0.3	0.7	0.98		-8.53	-8.00014	-8.02889
12	CAT-13d	CAT-13i	1.2	0.585	0.07			13	CAT-13o	0.3	0.88	0.56		-8.53	-7.82014	-8.44889
13	CAT-13e	CAT-17g	0.22	0.62	0.19			14	CAT-17a	-1.89	-4.0925	-2.59		-10.72	-12.7926	-11.5989
14	CAT-13e	CAT-17i	0.49	-1.74	-1.31			15	CAT-17b	-1.18	-0.415	-0.34		-10.01	-9.11514	-9.34889
15	CAT-13g	CAT-17g	-0.65	1.51	1.28			16	CAT-17c	-1.02	-1.8775	-1.35		-9.85	-10.5776	-10.3589
16	CAT-13g	CAT-17i	-0.38	-0.4475	-0.22			17	CAT-17d	-0.58	0.9525	1.25		-9.41	-7.74764	-7.75889
17	CAT-13h	CAT-17i	0.16	-1.2475	-1.01			18	CAT-17e	-1.18	-0.4375	-0.19		-10.01	-9.13764	-9.19889
18	CAT-13j	CAT-4o	-0.65	-0.645	-0.35			19	CAT-17f	-0.58	-0.235	-0.64		-9.41	-8.93514	-9.64889
19	CAT-13k	CAT-4d	0.59	-0.54	-0.85			20	CAT-17g	-0.9	-0.3025	0.51		-9.73	-9.00264	-8.49889
20	CAT-13k	CAT-4b	0.07	-0.8875	-0.81			21	CAT-17h	-1.49	-0.215	-0.05		-10.32	-8.91514	-9.05889
21	CAT-13n	CAT-13k	-1.16	-1.73	-2.06			22	CAT-17i	-0.63	-0.18	-0.99		-9.46	-8.88014	-9.99889
22	CAT-13n	CAT-13a	-0.3	-0.7	-0.98			23	CAT-24	-2.51	-2.315	-2.49		-11.34	-11.0151	-11.4989
23	CAT-13n	CAT-4i	0.28	-1.54	-0.93			24	CAT-4a	0.91	-0.1825	-0.02		-7.92	-8.88264	-9.02889
24	CAT-13o	CAT-17i	-0.93	-1.06	-1.55			25	CAT-4b	-0.79	-2.185	-1.9		-9.62	-10.8851	-10.9089
25	CAT-13o	CAT-17h	-1.79	-1.095	-0.61			26	CAT-4c	0.99	0.2375	0.61		-7.84	-8.46264	-8.39889
26	CAT-17b	CAT-13d	-0.45	-0.845	-0.05			27	CAT-4d	-0.27	-2.6075	-1.93		-9.1	-11.3076	-10.9389
27	CAT-17b	CAT-17e	0	0.9625	0.16			28	CAT-4i	0.58	0.9525	0.06		-8.25	-7.74764	-8.94889
28	CAT-17c	CAT-17e	-0.16	1.44	1.16			29	CAT-4j	-0.18	0.6	1.05		-9.01	-8.10014	-7.95889
29	CAT-17f	CAT-17e	-0.6	-0.2025	0.45			30	CAT-4k	0.99	0.8375	1.43		-7.84	-7.86264	-7.57889
30	CAT-17g	CAT-17c	-0.12	-1.575	-1.86			31	CAT-4l	-0.5	1.81	2.28		-9.33	-6.89014	-6.72889
31	CAT-17g	CAT-17f	0.32	-1.8	-1.15			32	CAT-4m	-0.31	-2.55	-1.56		-9.14	-11.2501	-10.5689
32	CAT-17g	CAT-13i	0.47	-1.3625	-0.84			33	CAT-4n	-0.25	-2.1675	-0.82		-9.08	-10.8676	-9.82889
33	CAT-17g	CAT-13c	0.42	-0.52	-0.77			34	CAT-4o	-0.54	-0.66	-0.29		-9.37	-9.36014	-9.29889
34	CAT-17g	CAT-17d	0.32	1.255	0.74			35	CAT-4p	-1.24	-3.045	-2.34		-10.07	-11.7451	-11.3489
35	CAT-17i	CAT-13f	0.38	1.5475	1.1
36	CAT-17i	CAT-17a	-1.26	-0.98	-1.61									-335.75	-335.75	-335.75
37	CAT-24	CAT-17e	1.33	1.8775	2.3
38	CAT-24	CAT-17i	1.88	1.9125	1.49
39	CAT-4a	CAT-4o	-1.45	-0.4775	-0.27
40	CAT-4a	CAT-13k	-1.77	-0.8475	-1.06
41	CAT-4c	CAT-4o	-1.53	-0.8975	-0.9
42	CAT-4i	CAT-13m	-0.5	-1.9425	-1.33
43	CAT-4j	CAT-4o	-0.36	-1.26	-1.34
44	CAT-4k	CAT-4o	-1.53	-1.4975	-1.72
45	CAT-4l	CAT-13k	-0.36	-2.84	-3.36
46	CAT-4m	CAT-4c	1.3	2.16	2.16
47	CAT-4m	CAT-13j	0.42	1.315	1.62
48	CAT-4m	CAT-4j	0.13	2.68	2.6
49	CAT-4m	CAT-4n	0.06	0.3825	0.74
50	CAT-4m	CAT-13k	-0.55	-0.2925	0.47
51	CAT-4m	CAT-13m	0.39	0.6075	0.28
52	CAT-4m	CAT-4l	-0.19	4.36	3.84
53	CAT-4m	CAT-4k	1.3	3.195	2.98
54	CAT-4m	CAT-4p	-0.93	-0.495	-0.78
55	CAT-4n	CAT-13k	-0.61	-0.63	-0.27
56	CAT-4o	CAT-4b	-0.25	-1.525	-1.61
57	CAT-4o	CAT-4d	0.27	-1.9475	-1.64
58	CAT-4p	CAT-13k	0.38	1.5275	1.25
